# Supplementary material for: Epileptogenicity of white matter lesions in cerebral small vessel disease: a systematic review and meta-analysis
Source: Springer Nature journal article supplement (doi:10.1007/s00415-023-11828-6), 2023-06-21
Supplement: MOESM1 [file 25520624]

## **SUPPLEMENTAL MATERIAL – Journal of Neurology**

### **Manuscript: Epileptogenicity of white matter lesions in cerebral small vessel disease: A systematic review and meta-analysis**

Jakob I. Doerrfuss<sup>1</sup>; Jonas M. Hebel<sup>1,\*</sup>; Martin Holtkamp<sup>1,2,\*</sup>

<sup>1</sup> Charité – Universitätsmedizin Berlin, corporate member of Freie Universität Berlin and Humboldt-Universität zu Berlin, Department of Neurology with Experimental Neurology, Berlin, Germany

<sup>2</sup> Epilepsy-Center Berlin-Brandenburg, Institute for Diagnostics of Epilepsy, Berlin, Germany

\* contributed equally

#### **Corresponding Author:**

Jakob I. Doerrfuss, Department of Neurology, Charité – Universitätsmedizin Berlin Campus Benjamin Franklin, Hindenburgdamm 30, 12203 Berlin, Germany

Email: jakob.doerrfuss@charite.de

**Table E1 Search strategy**

| <b>MedLine database</b> |                                                                                                                                                |
|-------------------------|------------------------------------------------------------------------------------------------------------------------------------------------|
| 1                       | epilepsy/                                                                                                                                      |
| 2                       | epileps*.ti, ab.                                                                                                                               |
| 3                       | seizures/                                                                                                                                      |
| 4                       | seizure*.ti,ab.                                                                                                                                |
| 5                       | 1 or 2 or 3 or 4                                                                                                                               |
| 6                       | white matter/ab, dg, in, pa, pp [Abnormalities, Diagnostic Imaging, Injuries, Pathology, Physiopathology] 10112                                |
| 7                       | white matter lesion*.ti,ab.                                                                                                                    |
| 8                       | white matter disease.ti,ab.                                                                                                                    |
| 9                       | white matter hyperintensit*.ti,ab.                                                                                                             |
| 10                      | white matter change*.ti,ab.                                                                                                                    |
| 11                      | leukoencephalopathies/                                                                                                                         |
| 12                      | leukoencephalopath*.ti,ab.                                                                                                                     |
| 13                      | leukoaraiosis/                                                                                                                                 |
| 14                      | leukoaraiosis.ti,ab.                                                                                                                           |
| 15                      | cerebral small vessel diseases/                                                                                                                |
| 16                      | cerebral small vessel disease*.ti,ab.                                                                                                          |
| 17                      | 6 or 7 or 8 or 9 or 10 or 11 or 12 or 13 or 14 or 15 or 16                                                                                     |
| 18                      | 5 and 17                                                                                                                                       |
| 19                      | limit 18 to (yr="2003 - 2023" and english)                                                                                                     |
| 20                      | limit 19 to (case reports or comment or editorial or "review")                                                                                 |
| 21                      | 19 not 20                                                                                                                                      |
| <b>Embase database</b>  |                                                                                                                                                |
| 1                       | epilepsy/                                                                                                                                      |
| 2                       | epileps*.ti,ab.                                                                                                                                |
| 3                       | seizure/                                                                                                                                       |
| 4                       | seizure*.ti,ab.                                                                                                                                |
| 5                       | 1 or 2 or 3 or 4                                                                                                                               |
| 6                       | white matter lesion*.ti,ab.                                                                                                                    |
| 7                       | white matter disease.ti,ab.                                                                                                                    |
| 8                       | white matter hyperintensit*.ti,ab.                                                                                                             |
| 9                       | white matter change*.ti,ab.                                                                                                                    |
| 10                      | leukoencephalopathy/                                                                                                                           |
| 11                      | leukoencephalopath*.ti,ab.                                                                                                                     |
| 12                      | leukoaraiosis/                                                                                                                                 |
| 13                      | leukoaraiosis.ti,ab.                                                                                                                           |
| 14                      | cerebral small vessel disease*.ti,ab.                                                                                                          |
| 15                      | 6 or 7 or 8 or 9 or 10 or 11 or 12 or 13 or 14                                                                                                 |
| 16                      | 5 and 15                                                                                                                                       |
| 17                      | limit 16 to (yr="2003 - 2023" and english)                                                                                                     |
| 18                      | limit 17 to ("preprints (unpublished, non-peer reviewed)" or (editorial or letter or "preprint (unpublished, non-peer reviewed)" or "review")) |
| 19                      | 17 not 18                                                                                                                                      |
| 20                      | case report.ti.                                                                                                                                |
| 21                      | 19 not 20                                                                                                                                      |

**Table E2 - Newcastle – Ottawa Quality Assessment Scale (NOS) for all case-control studies included in this review**

|                 |             | Selection (seizures/epilepsy)                           |                                                         |                    |                                                | Comparability                                  |                                      | Exposure (WML)                                                                                                                 |                                                     |                                        | Quality score (0-9) |
|-----------------|-------------|---------------------------------------------------------|---------------------------------------------------------|--------------------|------------------------------------------------|------------------------------------------------|--------------------------------------|--------------------------------------------------------------------------------------------------------------------------------|-----------------------------------------------------|----------------------------------------|---------------------|
| First author    | Year        | Case definition is adequate with independent validation | Consecutive or obviously representative series of cases | Community controls | Controls with no history of disease (endpoint) | Study controls for cardiovascular risk factors | Study controls for additional factor | Ascertainment of exposure using secure record (eg surgical records) or structured interview where blind to case/control status | Same method of ascertainment for cases and controls | Non-response rate same for both groups |                     |
| <b>Abraira</b>  | <b>2019</b> | ☆                                                       | ☆                                                       | -                  | ☆                                              | -                                              | -                                    | ☆                                                                                                                              | ☆                                                   | -                                      | 5                   |
| <b>De Reuck</b> | <b>2007</b> | ☆                                                       | -                                                       | -                  | ☆                                              | -                                              | -                                    | ☆                                                                                                                              | -                                                   | -                                      | 3                   |
| <b>Hanby</b>    | <b>2015</b> | ☆                                                       | ☆                                                       | ☆                  | ☆                                              | -                                              | -                                    | ☆                                                                                                                              | ☆                                                   | -                                      | 6                   |
| <b>Jansen</b>   | <b>2008</b> | ☆                                                       | -                                                       | ☆                  | ☆                                              | -                                              | -                                    | ☆                                                                                                                              | ☆                                                   | -                                      | 5                   |
| <b>Johnson</b>  | <b>2019</b> | -                                                       | ☆                                                       | ☆                  | ☆                                              | ☆                                              | ☆                                    | ☆                                                                                                                              | ☆                                                   | ☆                                      | 8                   |
| <b>Mao</b>      | <b>2016</b> | ☆                                                       | ☆                                                       | -                  | ☆                                              | ☆                                              | ☆                                    | ☆                                                                                                                              | ☆                                                   | ☆                                      | 8                   |
| <b>Maxwell</b>  | <b>2013</b> | ☆                                                       | -                                                       | -                  | ☆                                              | -                                              | -                                    | ☆                                                                                                                              | ☆                                                   | -                                      | 4                   |
| <b>Stösser</b>  | <b>2019</b> | ☆                                                       | ☆                                                       | -                  | ☆                                              | -                                              | -                                    | ☆                                                                                                                              | ☆                                                   | -                                      | 5                   |
| <b>Tartara</b>  | <b>2022</b> | ☆                                                       | ☆                                                       | -                  | -                                              | -                                              | ☆                                    | ☆                                                                                                                              | ☆                                                   | ☆                                      | 6                   |
| <b>Turon</b>    | <b>2021</b> | ☆                                                       | ☆                                                       | -                  | ☆                                              | -                                              | -                                    | ☆                                                                                                                              | ☆                                                   | -                                      | 5                   |
| <b>Uslu</b>     | <b>2021</b> | ☆                                                       | ☆                                                       | -                  | ☆                                              | -                                              | ☆                                    | ☆                                                                                                                              | ☆                                                   | ☆                                      | 7                   |

WML white matter lesions. The scale ranges from 0 to 9 points (each star represents one point) with a higher score indicating a superior quality. A score of  $\geq 7$  indicates a study of high methodical quality.

**Table E3 - In patients with first seizure or epilepsy, do the amount and localization of WML of presumed vascular origin differ in comparison to people who never had a seizure?**

| Author   | Year | Properties of epilepsy group                                                                                                                                                                                                                                                                                                                  | WML load epilepsy group                                                                                                                                                | WML load control group                                                                                                                                          |                                                                                                                 | Main results regarding WML load                                                                                                                                                                                                                                                                                                                 |
|----------|------|-----------------------------------------------------------------------------------------------------------------------------------------------------------------------------------------------------------------------------------------------------------------------------------------------------------------------------------------------|------------------------------------------------------------------------------------------------------------------------------------------------------------------------|-----------------------------------------------------------------------------------------------------------------------------------------------------------------|-----------------------------------------------------------------------------------------------------------------|-------------------------------------------------------------------------------------------------------------------------------------------------------------------------------------------------------------------------------------------------------------------------------------------------------------------------------------------------|
| Abraira  | 2019 | - patients with epilepsy, onset $\geq$ 60 years<br>- MRI with no epileptogenic lesions<br>- psychogenic non-epileptic seizures and neurodegenerative diseases excluded                                                                                                                                                                        | Fazekas 0: 15 (45.5%)<br>Fazekas 1: 15 (45.5%)<br>Fazekas 2: 3 (9.1%)<br>Fazekas 3: 0 (0)                                                                              | Control group I<br>Fazekas 0: 11 (26.8%)<br>Fazekas 1: 12 (29.3%)<br>Fazekas 2: 17 (41.5%)<br>Fazekas 3: 1 (2.4%)                                               | Control group II<br>Fazekas 0: 15 (57.7%)<br>Fazekas 1: 9 (34.6%)<br>Fazekas 2: 1 (3.8%)<br>Fazekas 3: 1 (3.8%) | - WML load lower in patients with epilepsy vs. control group I, $p = 0.004$<br>- WML load not statistically significantly different in epilepsy vs. control group II, $p=0.593$                                                                                                                                                                 |
| De Reuck | 2007 | - patients with at least one seizure with history of prior lacunar stroke<br>- no patients with history of head trauma, birth complications, drug abuse or family history of epilepsy<br>- age of participants not reported                                                                                                                   | Degree of white matter changes (not further specified)<br>0.59                                                                                                         | Degree of white matter changes (not further specified)<br>0.64                                                                                                  |                                                                                                                 | - no statistically significant difference in degree of white matter changes in seizure/epilepsy group vs. control group, $p=0.524$ .                                                                                                                                                                                                            |
| Hanby    | 2015 | - patients with epilepsy, onset $>$ 50 years<br>- MRI with no epileptogenic lesions<br>- no patients with history of stroke or transient ischemic attack or severe cognitive dysfunction                                                                                                                                                      | White matter hyperintensity volume: 1,339 $\text{mm}^3$ (+/- 1,408)                                                                                                    | White matter hyperintensity volume: 514 $\text{mm}^3$ (+/- 481)                                                                                                 |                                                                                                                 | - white matter hyperintensity volume higher in epilepsy group vs. control group, $p=0.047$                                                                                                                                                                                                                                                      |
| Jansen   | 2008 | - patients with focal epilepsy of unknown etiology, no age restrictions<br>- no patients with structural epilepsy, history of status epilepticus, progressive neurological disorder, cognitive decline                                                                                                                                        | - WML volume: 160 $\text{mm}^3$ (+/- 577)<br>- prevalence of subcortical white matter lesions: 46%                                                                     | - WML volume: 203 $\text{mm}^3$ (+/- 350)<br>- prevalence of subcortical white matter lesions: 63%                                                              |                                                                                                                 | - no statistically significant difference in subcortical WML in epilepsy group vs. control group, $p=0.7$                                                                                                                                                                                                                                       |
| Johnson  | 2019 | - participants of a community-based study on atherosclerosis risk with $\geq$ 2 seizures occurring at an age of $\geq$ 60 years according to hospitalization records and Medicare claims<br>- MRI was performed <i>before</i> onset of first seizure<br>- no patients with multiple sclerosis, brain tumors, brain surgery or brain radiation | - WML volume: 21,800 $\text{mm}^3$ (+/- 17,500)<br>- median white matter grade 1 (quartiles 1-2)                                                                       | - WML volume: 17,500 $\text{mm}^3$ (+/- 16,500)<br>- median white matter grade 1 (quartiles 1-2)                                                                |                                                                                                                 | - no statistically significant difference in WML volume in patients who developed epilepsy later in life vs. control group, $p=0.163$<br>- WML volume not associated with later development of epilepsy, OR 1.33, 95%CI 0.85-2.08<br>- white matter grade independently associated with later development of epilepsy, HR 1.27, 95%CI 1.06–1.54 |
| Mao      | 2016 | - patients with epilepsy, no age restrictions<br>- new onset epilepsy and chronic epilepsy analyzed separately<br>- no patients with history of stroke, transient ischemic attack, multiple sclerosis, signs of "bi-hemispheric brain injury" (trauma, tumor, surgical procedures)                                                            | - prevalence of white matter lesions: 6.4%<br>- ARWMC 0: 73 (33.6%)<br>ARWMC 1-2: 80 (36.9%)<br>ARWMC 3-4: 38 (17.5%)<br>ARWMC 5-8: 23 (10.6%)<br>ARWMC 9-12: 3 (1.4%) | - prevalence of white matter lesions 43.5%<br>- ARWMC 0: 13 (56.5%)<br>ARWMC 1-2: 8 (34.8%)<br>ARWMC 3-4: 1 (4.3%)<br>ARWMC 5-8: 0 (0%)<br>ARWMC 9-12: 1 (4.3%) |                                                                                                                 | - significantly higher WML scores in patients with epilepsy vs. control group, IRR 1.93, 95%CI 1.13-3.30 (adjusted for age)                                                                                                                                                                                                                     |

| Author  | Year | Properties of epilepsy group                                                                                                                                                                                                                                                                                                                               | WML load epilepsy group                                                                                                                                                      | WML load control group                                                                                                                                                       | Main results regarding WML load                                                                                                                                                                                                                                                                                        |
|---------|------|------------------------------------------------------------------------------------------------------------------------------------------------------------------------------------------------------------------------------------------------------------------------------------------------------------------------------------------------------------|------------------------------------------------------------------------------------------------------------------------------------------------------------------------------|------------------------------------------------------------------------------------------------------------------------------------------------------------------------------|------------------------------------------------------------------------------------------------------------------------------------------------------------------------------------------------------------------------------------------------------------------------------------------------------------------------|
| Maxwell | 2013 | - patients with one unprovoked seizure or epilepsy, onset > 60 years,                                                                                                                                                                                                                                                                                      | - prevalence of WML: 58.1%<br>- Fazekas 0: 61 (58.1%)<br>Fazekas 1: 28 (26.7%)<br>Fazekas 2: 11 (10.5%)<br>Fazekas 3: 5 (4.8%)                                               | - prevalence of WML 29.5%<br>- Fazekas 0: 15 (45.5%)<br>Fazekas 1: 15 (45.5%)<br>Fazekas 2: 3 (9.1%)<br>Fazekas 3: 0 (0)                                                     | - small vessel disease (WML, leukoaraiosis, lacunar infarcts, and enlarged perivascular spaces) statistically significant more frequent in epilepsy group vs. control group<br>- Fazekas score non-significantly higher in epilepsy group vs. control group, p=0.06, 0.88, 0.05, 0.06 for Fazekas 0,1,2,3 respectively |
| Stösser | 2019 | - patients with first focal impaired awareness seizure; ≥ 60 years<br>- no patients with epilepsy, epileptogenic lesions on MRI and moderate to severe cognitive impairment                                                                                                                                                                                | - global Fazekas 0: 4 (3.4%)<br>global Fazekas 1: 34 (28.8%)<br>global Fazekas 2: 34 (28.8%)<br>global Fazekas 3: 46 (39.0%)<br>- prevalence of juxtacortical lesions: 80.5% | - global Fazekas 0: 9 (7.6%)<br>global Fazekas 1: 68 (57.6%)<br>global Fazekas 2: 27 (22.9%)<br>global Fazekas 3: 14 (11.9%)<br>- prevalence of juxtacortical lesions: 22.0% | - significantly higher WML scores in patients with seizure vs. control group, p<0.001<br>- juxtacortical lesions more common in seizure group vs. control group (80.5% vs 22.0%, p < 0.001)                                                                                                                            |
| Turon   | 2021 | - patients with ≥ 1 unprovoked seizure <i>and</i> incidental diagnosis of CSVD (subcortical microbleeds, Fazekas score ≥ 1 or ≥ 1 lacunar infarct), aged ≥ 60 years<br>- no patients with neurodegenerative diseases, epileptogenic lesion, autoimmune diseases, or psychogenic nonepileptic seizures                                                      | - Fazekas 0-1: 20 (74.1%)<br>Fazekas 3-4: 7 (25.9%)                                                                                                                          | - Fazekas 0-1: 25 (92.6%)<br>Fazekas 3-4: 2 (7.4%)                                                                                                                           | - patients with epilepsy had non-significantly more often Fazekas score >2, p=0.068)<br>- CSVD burden score (including lacunar infarcts, cerebral microbleeds, Fazekas score > 2, enlarged perivascular spaces) higher in epilepsy vs. non-epilepsy group, p = 0.012                                                   |
| Uslu    | 2021 | - patients with epilepsy ≥ 18 years old<br>- no patients with unclassified epilepsy, acute symptomatic seizures or isolated unprovoked seizure<br>- no patients with vascular risk factors (hypertension, diabetes mellitus, cardiac diseases), no neurodegenerative diseases or other central nervous system diseases, or cerebral lesions other than WMH | - prevalence of WML: 27.7%                                                                                                                                                   | - prevalence of WML: 14.6%                                                                                                                                                   | - no statistically significant difference in presence of WML between both groups p=0.126<br>- healthy controls: WMH only in frontal lobes, epilepsy: WMH in frontal, parietal, temporal and occipital localization (only descriptive)                                                                                  |

WMH white matter hyperintensity, WML white matter lesions, TIA transient ischemic attack, OR odds ratio, HR hazards ratio, IRR incidence rate ratio, 95%CI 95% confidence interval

**Table E4 - In patients with a first seizure or epilepsy, is the presence of WML of presumed vascular origin associated with an increased risk of recurrent seizures as compared to patients without WML?**

| Author  | year | Definition of CSVD               | Patient collective                                                                                                                                                                                                                                                                                                                                                                                                                        | Results regarding seizure frequency                                                                                                                                                                                                                                                                                                                                                              |
|---------|------|----------------------------------|-------------------------------------------------------------------------------------------------------------------------------------------------------------------------------------------------------------------------------------------------------------------------------------------------------------------------------------------------------------------------------------------------------------------------------------------|--------------------------------------------------------------------------------------------------------------------------------------------------------------------------------------------------------------------------------------------------------------------------------------------------------------------------------------------------------------------------------------------------|
| Uslu    | 2021 | CSVD defined as Fazekas $\geq 1$ | <ul style="list-style-type: none"> <li>- patients with epilepsy, <math>\geq 18</math> years old</li> <li>- no patients with unclassified epilepsy, acute symptomatic seizures or isolated unprovoked seizure</li> <li>- no patients with vascular risk factors (hypertension, diabetes mellitus, cardiac diseases), no neurodegenerative diseases or other central nervous system diseases, or cerebral lesions other than WMH</li> </ul> | - presence of WML not associated with frequency of seizures ( $p=0.444$ ); "frequency of seizures" not defined                                                                                                                                                                                                                                                                                   |
| Tartara | 2022 | CSVD defined as Fazekas $\geq 1$ | <ul style="list-style-type: none"> <li>- patients with newly diagnosed epilepsy, <math>\geq 60</math> years old</li> <li>- epilepsy of unknown cause or structural cause</li> <li>- no patients with dementia, psychogenic seizures, rapidly growing CNS tumors</li> </ul>                                                                                                                                                                | <ul style="list-style-type: none"> <li>- absence of WML associated with statistically significant higher probability of achieving seizure freedom, <math>p=0.012</math></li> <li>- presence of WML independently associated with higher risk of seizure recurrence, OR 1.8, 95%CI 1.042-3.110)</li> <li>- the severity of WML did not affect the outcome regarding seizure recurrence</li> </ul> |

CSVD cerebral small vessel disease
